# Supplementary material
Source: PubMed Central journal article supplement (PMC7255962)
Supplement: NIHMS1580189-supplement-Supplemental_Material.pdf [file NIHMS1580189-supplement-Supplemental_Material.pdf]

# SUPPLEMENTAL MATERIALS

## **Drug Targeting of Plasminogen Activator Inhibitor-1 Inhibits Metabolic Dysfunction and Atherosclerosis in a Murine Model of Metabolic Syndrome**

Hekmat B. Khoukaz,\* Yan Ji,\* Drew J. Braet, Manisha Vadali, Ahmed A. Abdelhamid, Cory D. Emal, Daniel A. Lawrence, William P. Fay

\*These authors contributed equally to this article.

From the Department of Medicine (HBK, YJ, DJB, MV, AAA, WPF) and Department of Medical Pharmacology & Physiology (WPF), University of Missouri School of Medicine; Research Service, Harry S. Truman Memorial Veterans Hospital (WPF), Columbia, MO, USA; Department of Chemistry (CDE), Eastern Michigan University, Ypsilanti, MI, USA; Department of Internal Medicine (DAL), University of Michigan Medical School, Ann Arbor, MI, USA.

Correspondence to William P. Fay, MD, Division of Cardiovascular Medicine, University of Missouri, 5 Hospital Drive, CE344–DC095.00, Columbia, Missouri 65212. Email: fayw@missouri.edu, Telephone: (573) 882-2296.

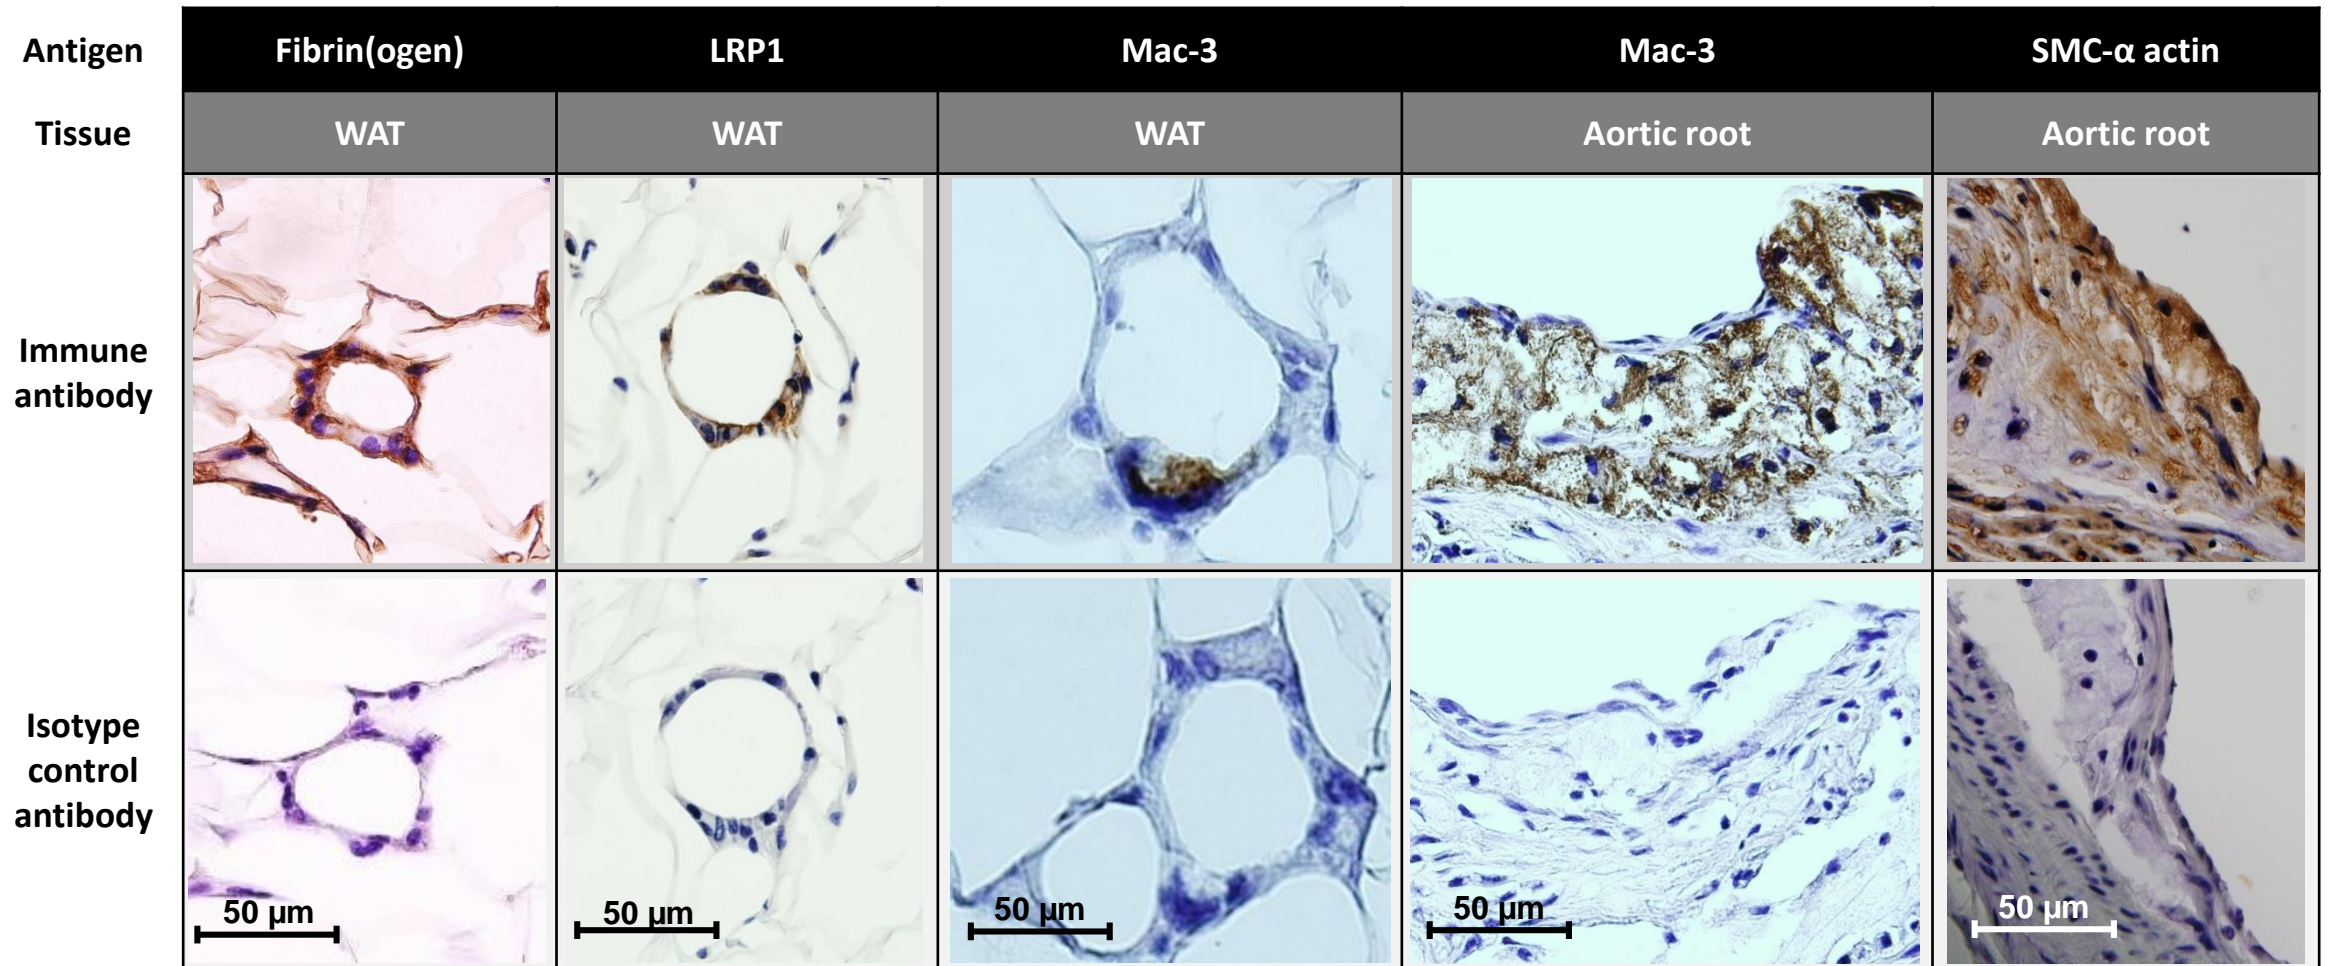

**Supplementary Figure I. Demonstration of specificity of antibodies used in immunohistochemical (IHC) analyses.** For each antigen shown, consecutive cross-sections (thickness 5-10  $\mu$ m) were subjected to IHC analysis, as described in methods, using either immune or isotype control primary antibodies, as shown. Positive immunostaining (brown color) is observed with immune antibody, but not with isotype control antibody. SMC, smooth muscle cell; WAT, white adipose tissue.

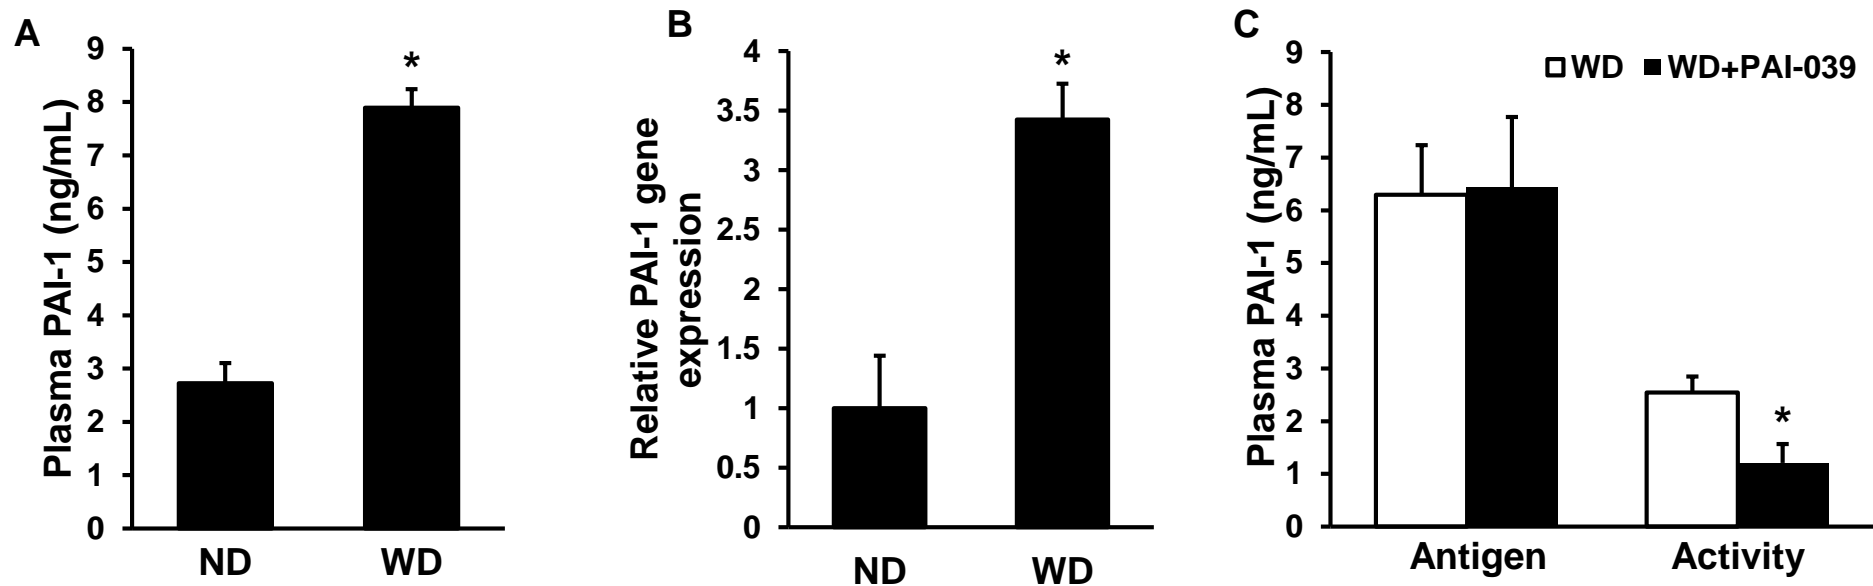

**Supplementary Figure II. Effects of diet and PAI-039 on PAI-1 expression.** (A) Plasma PAI-1 antigen is significantly increased in male *ldlr*<sup>-/-</sup> mice fed western diet (WD) for 4 weeks compared to sex- and age-matched *ldlr*<sup>-/-</sup> mice maintained on a normal laboratory diet (ND); \*P<0.001, n=6/group. (B) PAI-1 gene expression is significantly increased in visceral white adipose tissue of *ldlr*<sup>-/-</sup> mice fed WD compared to those maintained on ND; \*P<0.01, n=6/group. (C) PAI-039 inhibits plasma PAI-1 activity in *ldlr*<sup>-/-</sup> mice, assessed after 12 weeks of WD; but does not significantly change PAI-1 antigen (n=4-5/group; \*P<0.05).

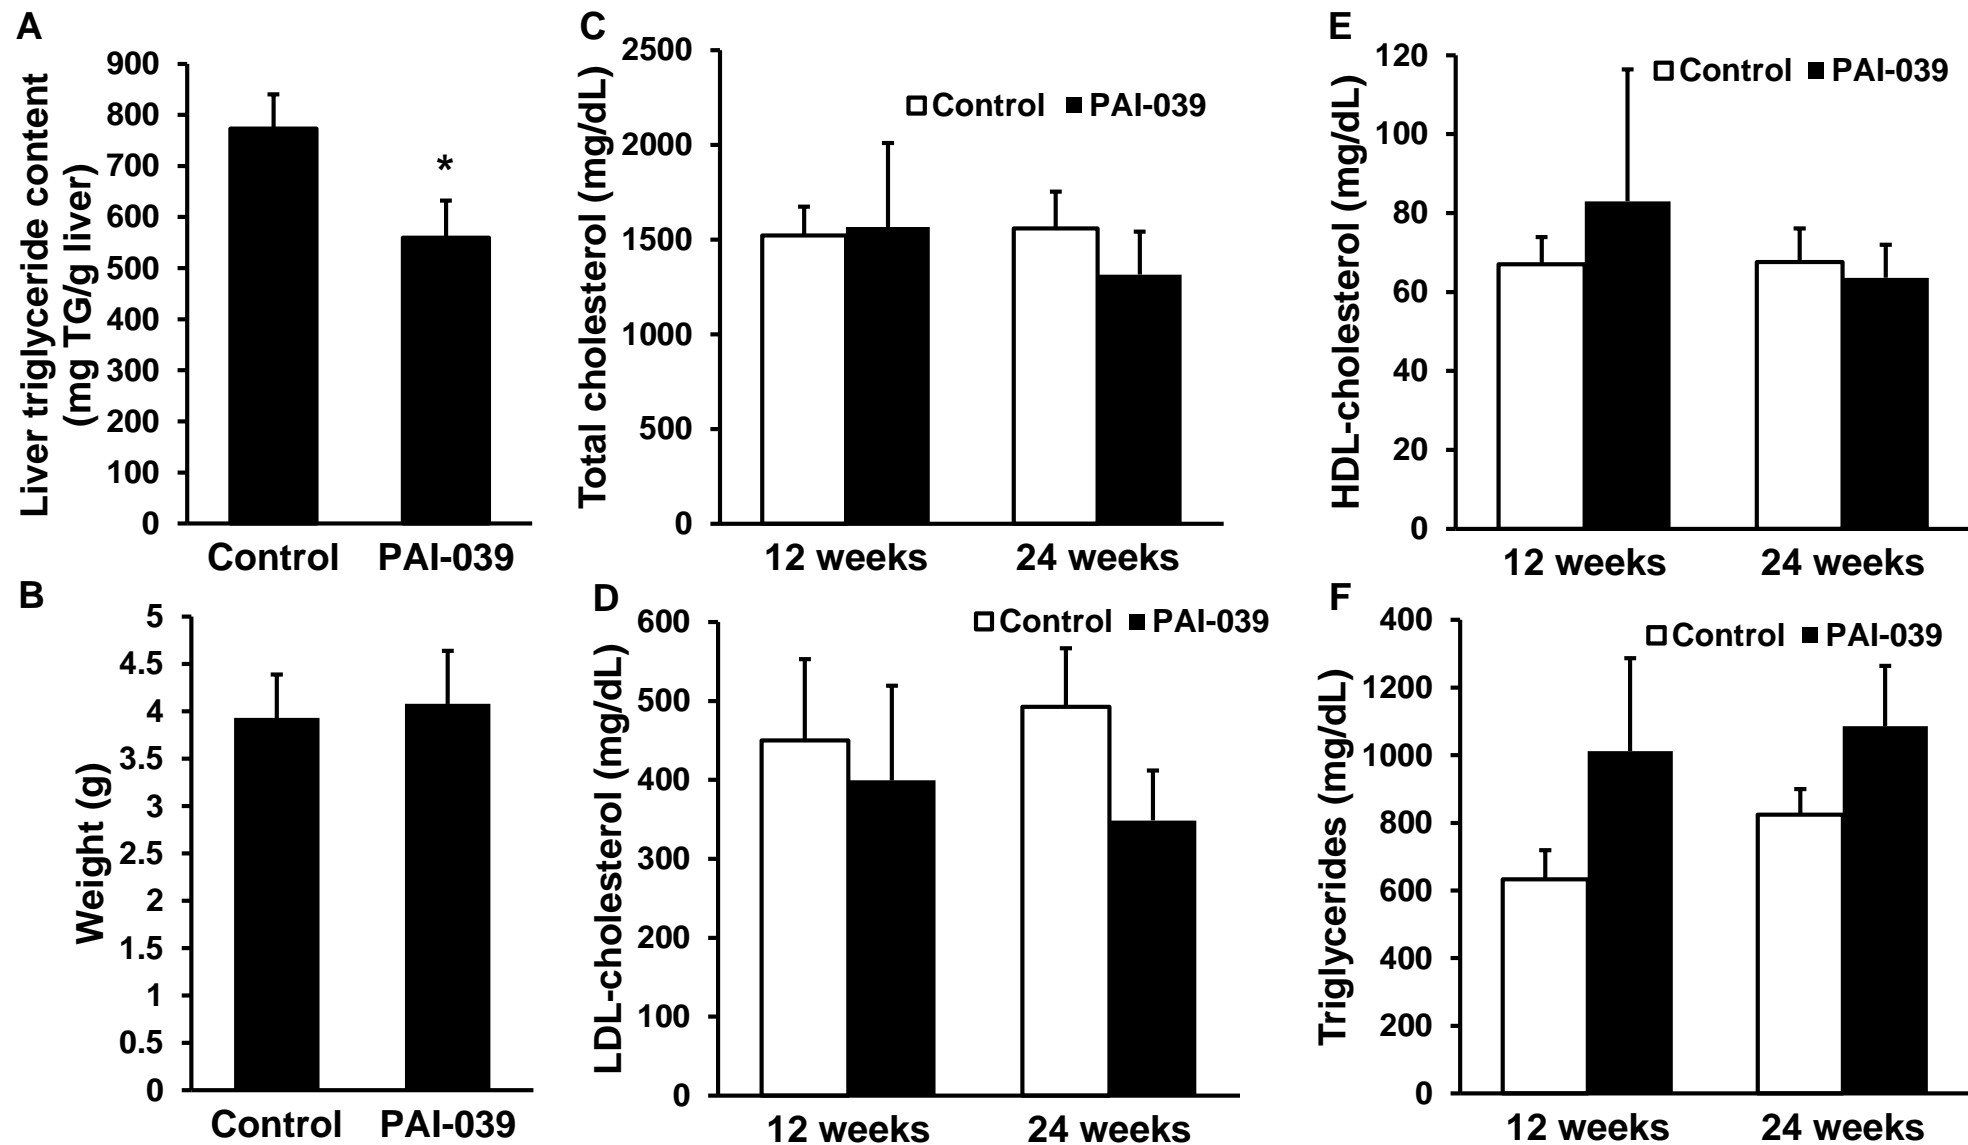

**Supplementary Figure III. PAI-039 decreases steatohepatosis without significantly altering plasma lipid profile.** Livers (A-B) and plasma samples (C-F) of *Idlr*<sup>-/-</sup> mice were assessed after 12 and 24 weeks of WD with or without PAI-039. **(A)** Liver triglyceride content assessed after 12 weeks of WD and normalized to organ's weight; n=7/group; \*P<0.05. TG, triglyceride. **(B)** Total liver weight assessed after 24 weeks of WD; n=4-5/group; P>0.8. **(C)** Total cholesterol, **(D)** LDL-cholesterol, **(E)** HDL-cholesterol, and **(F)** Triglycerides levels. In panels C-F, differences between groups did not achieve statistical significance (P>0.1; n=4-5/group). TG, triglyceride.

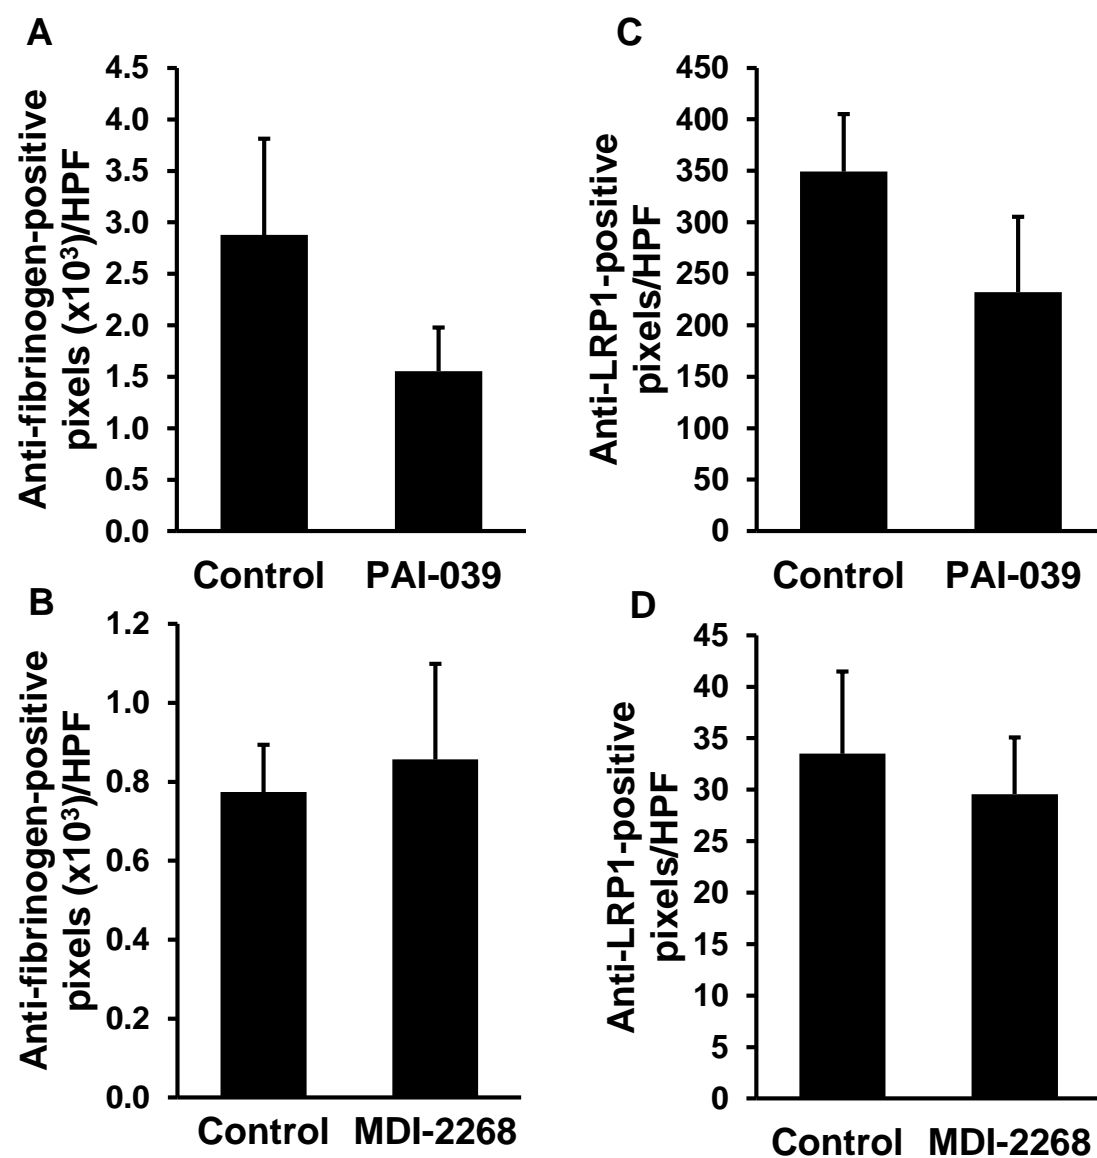

**Supplementary Figure IV. Pharmacologic PAI-1 inhibition does not significantly alter visceral adipose tissue fibrin(ogen) or LRP1 content.** Epididymal white adipose tissue of *ldlr*<sup>-/-</sup> mice was harvested after 12 weeks of WD with or without a PAI-1 inhibitor. **(A)** PAI-039 does not significantly affect fibrin(ogen) deposition in epididymal white adipose tissue; n=4-5/group; P>0.2. **(B)** MDI-2268 does not significantly affect fibrin(ogen) deposition in epididymal white adipose tissue; n=6-7/group; P>0.7. **(C)** PAI-039 does not significantly affect LRP1 content in epididymal white adipose tissue; n=4-5/group; P>0.6. **(D)** MDI-2268 does not significantly affect LRP1 content in epididymal white adipose tissue; n=6-7/group; P>0.2. HPF, high-power field.

## Major Resources Tables

### Animals (in vivo studies)

| Species | Vendor or Source       | Background Strain                                            | Sex    |
|---------|------------------------|--------------------------------------------------------------|--------|
| Mouse   | The Jackson Laboratory | B6.129S7Ldlr<tm1Her>/J<br>HOM Homozygous for<br>Ldlr<tm1Her> | Male   |
| Mouse   | The Jackson Laboratory | C57BL/6J                                                     | Female |

### Animal breeding

|                 | Species | Vendor or Source       | Background Strain                                            | Other Information |
|-----------------|---------|------------------------|--------------------------------------------------------------|-------------------|
| Parent - Male   | mouse   | The Jackson Laboratory | B6.129S7Ldlr<tm1Her>/J<br>HOM Homozygous for<br>Ldlr<tm1Her> | -                 |
| Parent - Female | mouse   | The Jackson Laboratory | C57BL/6J                                                     | -                 |

### Antibodies

| Target antigen                              | Vendor or Source                                  | Catalog #     | Working concentration | Lot #               |
|---------------------------------------------|---------------------------------------------------|---------------|-----------------------|---------------------|
| Mac 3                                       | BD Pharmingen                                     | 553322        | 2 µg/mL               | -                   |
| LDL receptor-related protein 1              | Dudley Strickland, PhD,<br>University of Maryland |               | 0.01 mg/mL            | -                   |
| LDL receptor-related protein 1              | Abcam                                             | Ab92544       | 4.6µg/mL              | -                   |
| Alpha-actin                                 | Santa Cruz Biotechnonology                        | Sc-32251      | 1µg/mL                | -                   |
| Fibrin(ogen)                                | Abcam                                             | Ab34269       | Dilution 1:200        | -                   |
| Mouse PAI-1 (capture antibody)              | Molecular innovations                             | H34G6         | 1µg/mL                | #ASMAPAI-GF-BIO-819 |
| Mouse PAI-1 (biotinylated primary antibody) | Molecular innovations                             | ASMPAI-GF-BIO | 1µg/mL                | #H34G6-119          |

### Cultured Cells

| Name                                      | Vendor or Source                         | Sex (F, M, or unknown) |
|-------------------------------------------|------------------------------------------|------------------------|
| Human coronary artery smooth muscle cells | ThermoFisher Scientific,<br>Lot #1689414 | Female                 |
